# Supplementary material
Source: PubMed Central journal article supplement (PMC2928692)
Supplement: emboj2010137s1.pdf [file emboj2010137s1.pdf]

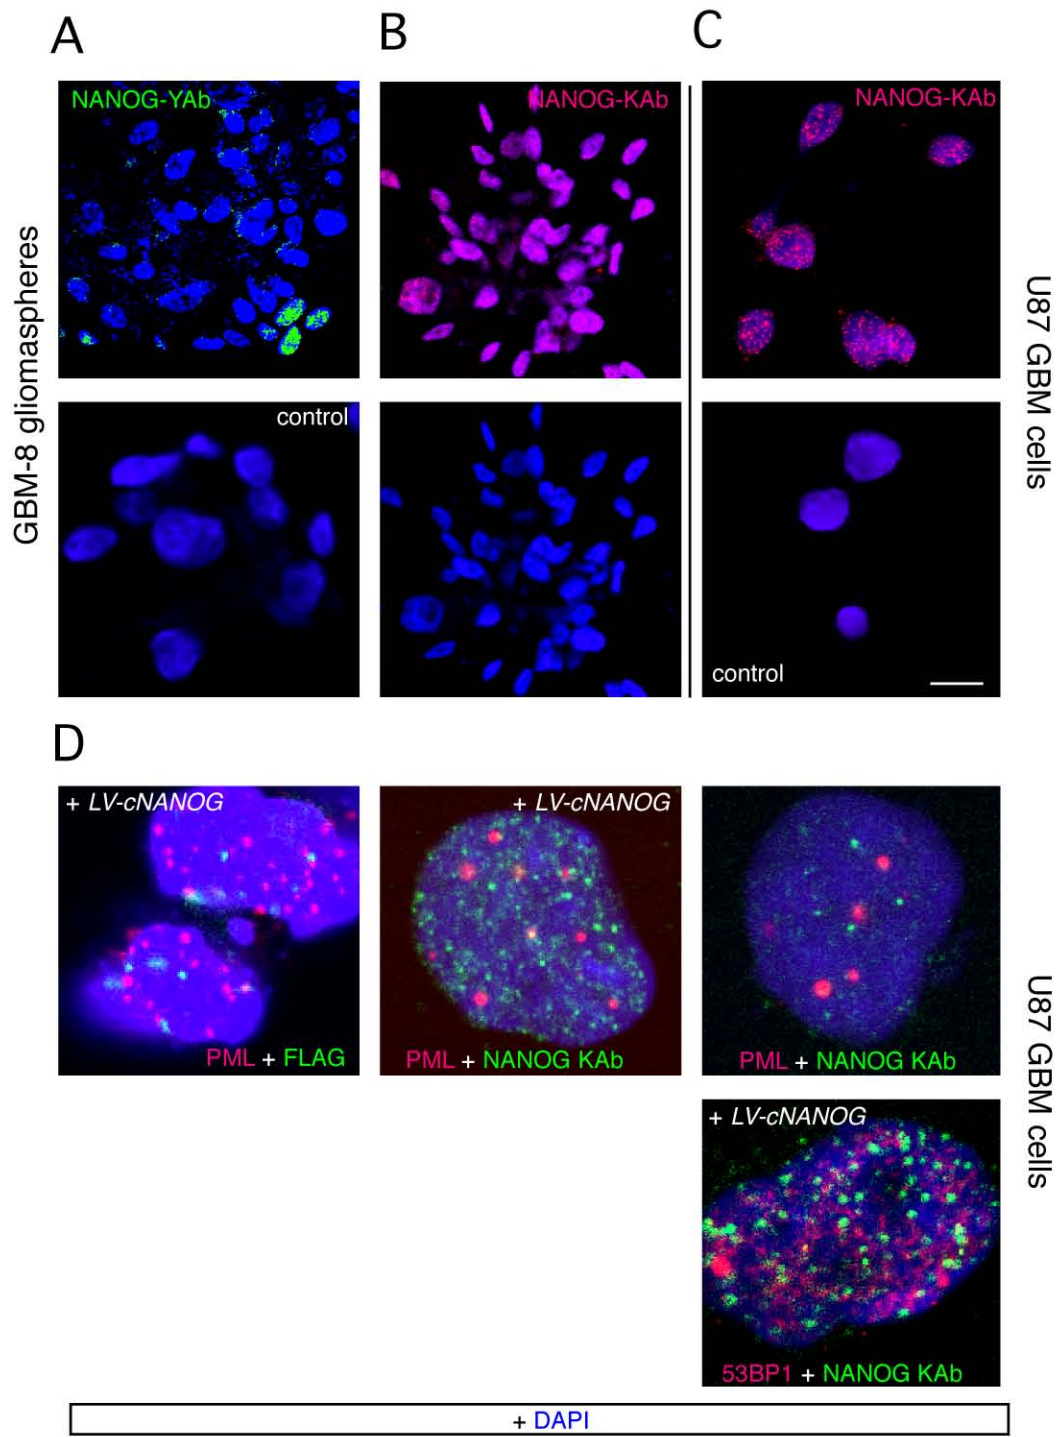

Fig. S1 Zbinden et al.

A

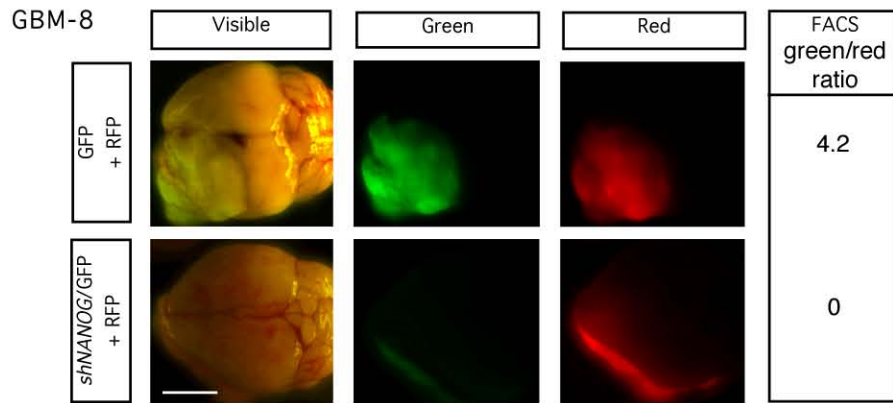

B

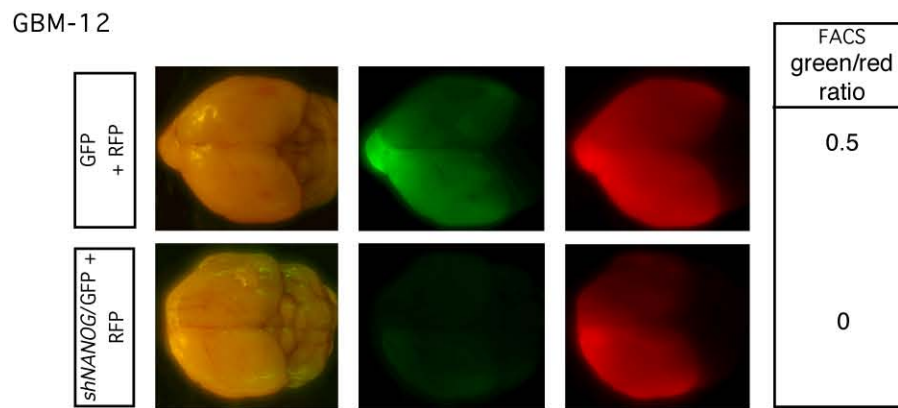

Fig. S2 Zbinden et al.

|                                 | Visible                                                                             | Green                                                                               | Red                                                                                 | FACS<br>green/red<br>ratio |
|---------------------------------|-------------------------------------------------------------------------------------|-------------------------------------------------------------------------------------|-------------------------------------------------------------------------------------|----------------------------|
| GFP<br>+ RFP                    |    |    |    | 0.5                        |
| shPTCH1/GFP<br>+ RFP            |    |    |    | 4.2                        |
| shSMOH/GFP<br>+ RFP             |    |    |    | 0                          |
| shNANOG/GFP<br>+ RFP            |   |   |   | 0                          |
| shPTCH1 + shNANOG<br>/GFP + RFP |  |  |  | 0                          |

Fig. S3 Zbinden et al.
